# Supplementary material
Source: MDPI journal article supplement (https://www.mdpi.com/1999-4907/14/7/1504)
Supplement: s1 [file s1]

Supplementary Materials Tabel S1: the primers for creating constructs

| Pe gene         | construct    | 5'-primer (restriction enzyme)                   | 3'-primer(restriction enzyme)          |
|-----------------|--------------|--------------------------------------------------|----------------------------------------|
| <i>PeCBL4</i>   | pGBKT7       | CATATGATGGGTTGCTACCATTCAAAG(NdeI)                | GGATCCCTACACTTCTGAATCTTCAACTTC(BamHI)  |
| <i>PeCBL4</i>   | pGADT7       | CATATGATGGGTTGCTACCATTCAAAG(NdeI)                | GGATCCCTACACTTCTGAATCTTCAACTTC(BamHI)  |
| <i>PeCBL4</i>   | pSPYCE(M)    | CCCTCTAGAATGGGTTGCTACCTTTCAAAG(XbaI)             | CCCGTCGACTATTTCTGAATCTTCAACTTC(SalI)   |
| <i>PeCBL4</i>   | clone        | ATGGGTTGCTACCTTTCAAAG                            | CTATATTTCTGAATCTTCAAC                  |
| <i>PeCBL4</i>   | pBI121 (GFP) | CCCTCTAGAATGGGTTGCTACCTTTCAAAG (XbaI)            | CCCTCTAGACTATATTTCTGAATCTTCAAC (XbaI)  |
| <i>PeCIPK24</i> | pGBKT7       | TTCCCGTCCATATGATGTCGTCTTCTAGAAGTGGTG (NdeI)      | AGGGGATCCCTAACCATTGTGCGCTG (BamHI)     |
| <i>PeCIPK25</i> | pGBKT7       | TTCCCGTCCATATGATGTCGTCTTCTAGAAGTGGT (NdeI)       | TAGGATCCCTAACCATTGTGCGCTGC (BamHI)     |
| <i>PeCIPK26</i> | pGBKT7       | TTCCCGTCGCATATGATGATGAAGAAAGTAACGAG (NdeI)       | AAGGATCCTCATTGTTCGAAGCAGGCA (BamHI)    |
| <i>PeCIPK27</i> | pGBKT7       | TTCCCGTG CATATGATGATGAAGAAAGTAACGAGAAT GG (NdeI) | AAGGATCCTTAGCACCCCTTCTGGAGGTTT (BamHI) |
| <i>PeCIPK24</i> | pGADT7       | TTCCCGTCCATATGATGTCGTCTTCTAGAAGTGGTG (NdeI)      | AGGGGATCCCTAACCATTGTGCGCTG (BamHI)     |
| <i>PeCIPK25</i> | pGADT7       | TTCCCGTCCATATGATGTCGTCTTCTAGAAGTGGT (NdeI)       | TAGGATCCCTAACCATTGTGCGCTGC (BamHI)     |
| <i>PeCIPK26</i> | pGADT7       | TTCCCGTCGCATATGATGATGAAGAAAGTAACGAG (NdeI)       | AAGGATCCTCATTGTTCGAAGCAGGCA (BamHI)    |
| <i>PeCIPK27</i> | pGADT7       | TTCCCGTG CATATGATGATGAAGAAAGTAACGAGAAT           | AAGGATCCTTAGCACCCCTTCTGGAGGTTT (BamHI) |

---

|                 |              |                                         |                                        |
|-----------------|--------------|-----------------------------------------|----------------------------------------|
|                 |              | GG (NdeI)                               |                                        |
| <i>PeCIPK24</i> | pSPYNE(R)173 | CCCGGATCCATGCCGTCTTCTAGAAGTGGTG (BamHI) | CCCGGTACCCTAACCATTTGTCGCTGCCTCT (KpnI) |
| <i>PeCIPK25</i> | pSPYNE(R)173 | CCCGGATCCATGTCGTCTTCTAGAAGTGGTG (BamHI) | CCCGGTACCCTAACCATTTGGCGCTGCCTCT (KpnI) |
| <i>PeCIPK26</i> | pSPYNE(R)173 | CCCGGATCCATGATGAAGAAAGTAACGAGA (BamHI)  | CCCGGTACCTCATTGTTCTGAAGCAGGCAGG (KpnI) |
| <i>PeCIPK27</i> | pSPYNE(R)173 | CCCGGATCCATGATGAAGAAAGTAACGAGA (BamHI)  | CCCGGTACCTTAGCACCTTCTGGAGGTTT (KpnI)   |

---

Supplementary Materials Tabel S2: GenBank accession numbers of *Populus* genes

---

| Gene            | GenBank accession numbers of <i>Populus</i> |
|-----------------|---------------------------------------------|
| <i>PeCBL4</i>   | DQ907706                                    |
| <i>PtCBL1</i>   | EF148841                                    |
| <i>PtCBL2</i>   | EF148842                                    |
| <i>PtCBL3</i>   | EF148850                                    |
| <i>PtCBL4</i>   | EF148844                                    |
| <i>PtCBL5</i>   | EF148843                                    |
| <i>PtCBL6</i>   | EF148846                                    |
| <i>PtCBL7</i>   | EF148845                                    |
| <i>PtCBL8</i>   | EF148847                                    |
| <i>PtCBL9</i>   | EF148848                                    |
| <i>PtCBL10</i>  | EF148849                                    |
| <i>PeCIPK24</i> | FJ821725                                    |
| <i>PeCIPK25</i> | FJ821726                                    |
| <i>PeCIPK26</i> | FJ821727                                    |
| <i>PeCIPK27</i> | FJ821728                                    |

---
